# Supplementary material for: Association of dispatcher-assisted cardiopulmonary resuscitation with initial shockable rhythm and survival after out-of-hospital cardiac arrest
Source: PubMed Central journal article supplement — Eur J Emerg Med. 2021 Aug 2;29(1):42–8. doi: 10.1097/MEJ.0000000000000861 (PMC8691373; doi:10.1097/mej.0000000000000861), 2021-08-02
Supplement: ejem-29-42-s001.pdf [file ejem-29-42-s001.pdf]

**SDC\_Fig. 1**

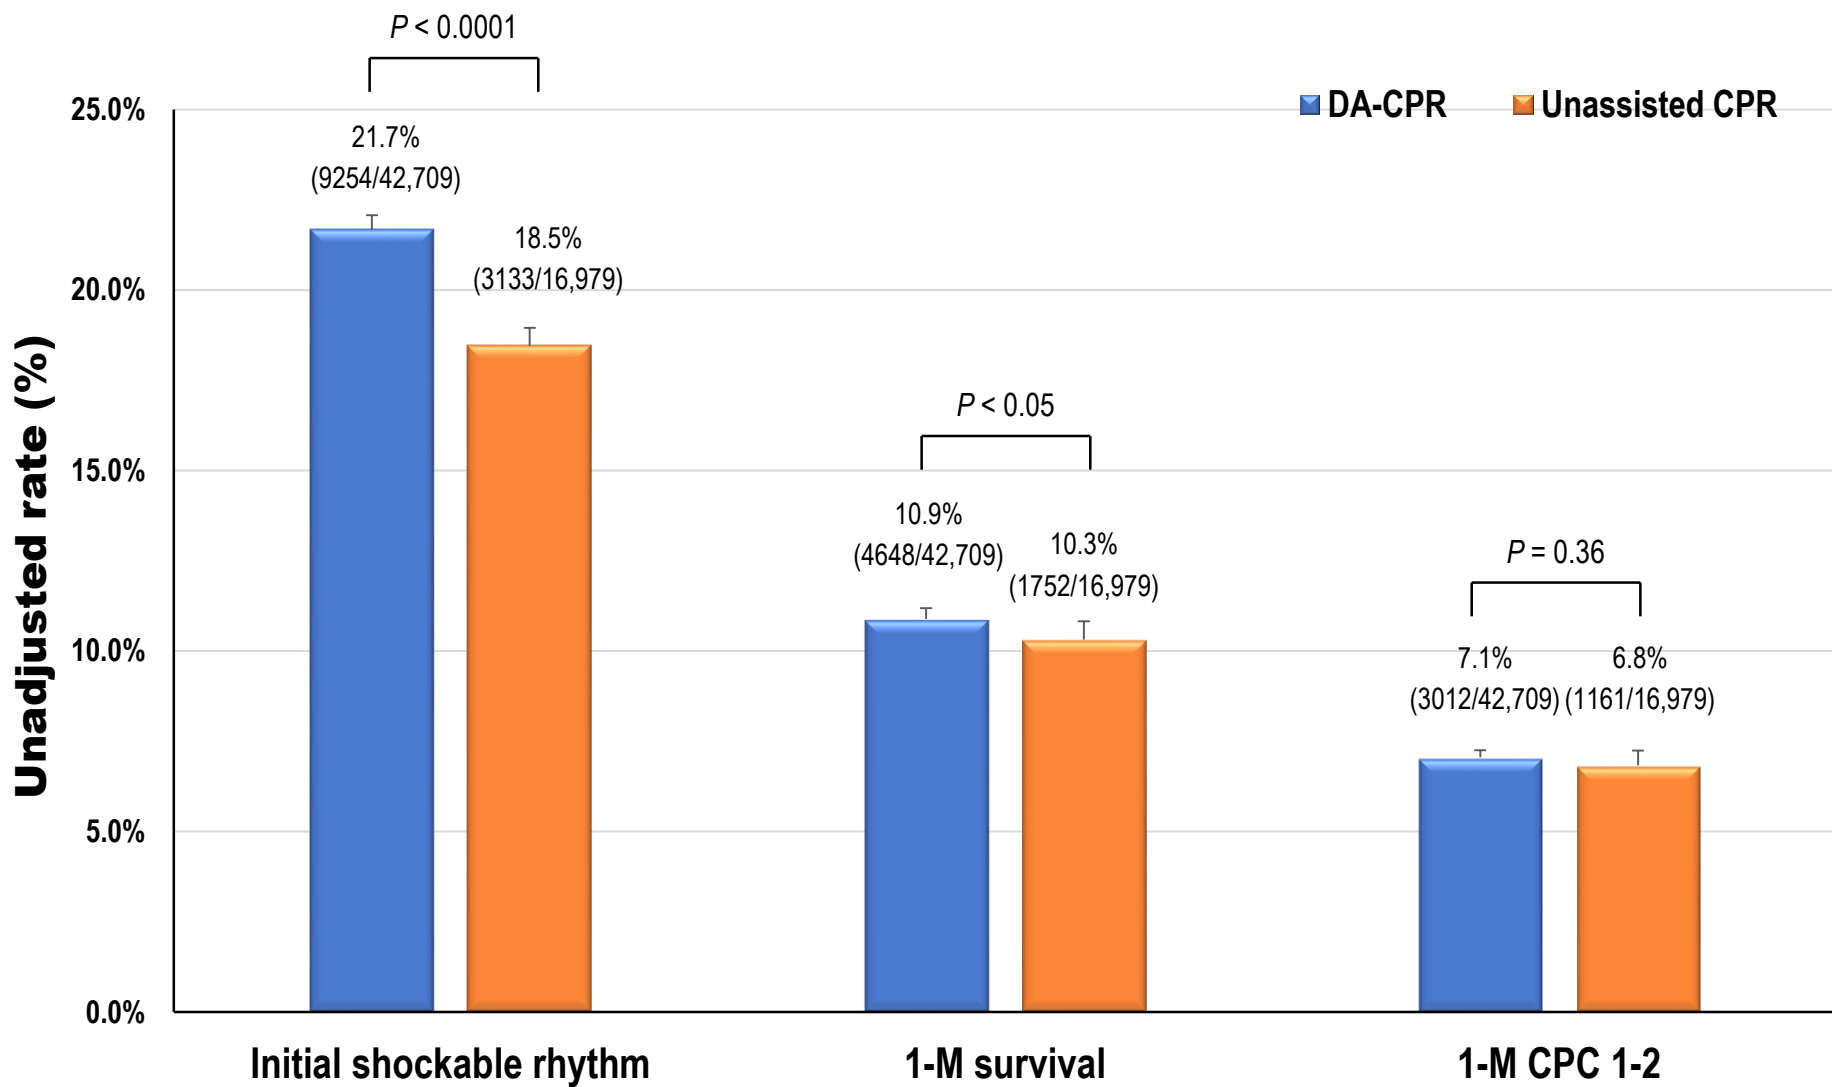

**Figure 1.** The incidence of initial shockable rhythm and unadjusted outcomes in the 59,688 unmatched patients  
CPC, Cerebral Performance Category; CPR, cardiopulmonary resuscitation; DA, dispatcher-assisted.

## SDC\_Fig. 2

| Outcomes     | Adjusted OR (95% CI) | <i>P</i> Value |
|--------------|----------------------|----------------|
| 1-M survival | 0.95 (0.89-1.02)     | 0.15           |
| 1-M CPC 1-2  | 0.91 (0.84-0.99)     | <0.05          |

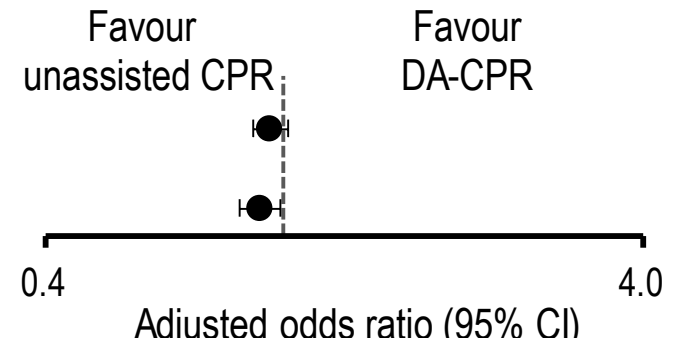

**Figure 2.** Adjusted odds ratios of DA-CPR for 1-month outcomes compared with unassisted CPR in the unmatched patients. CI, confidence interval; CPC, Cerebral Performance Category; CPR, cardiopulmonary resuscitation; DA, dispatcher-assisted; OR, odds ratio.
